# Supplementary material
Source: HighWire-hosted journal article supplement (http://ajnr-stage2.highwire.org/highwire/filestream/64064/field_highwire_adjunct_files/0/17-00872.pdf)
Supplement: 17-00872.pdf [file 17-00872.pdf]

## ON-LINE APPENDIX

### Gadolinium

Gadolinium-based contrast agents are of 2 main classes: linear open-chain  $\text{Gd}^{3+}$  chelates and macrocyclic  $\text{Gd}^{3+}$  chelates (On-line Figure). In the macrocyclic structure, the  $\text{Gd}^{3+}$  ion is caged in the cavity of the ligand. Thus, the rate of dissociation of the  $\text{Gd}^{3+}$  ion from macrocyclic ligands is slower than that from linear ligands, resulting in greater molecular stability for macrocyclic ligands.  $\text{Gd}^{3+}$  stability is also determined by the rate of transmetallation. This process involves the exchange between  $\text{Gd}^{3+}$  and endogenous ions. Such endogenous ions present in the body that induce transmetallation include  $\text{Na}^+$ ,  $\text{K}^+$ ,  $\text{Mg}^{2+}$ ,  $\text{Ca}^{2+}$ ,  $\text{Fe}^{3+}$ , and  $\text{Zn}^{2+}$ . Free  $\text{Fe}^{3+}$  and  $\text{Cu}^{2+}$ , present in very small amounts in the blood, and  $\text{Na}^+$ ,  $\text{K}^+$ ,  $\text{Mg}^{2+}$ , and  $\text{Cu}^{2+}$  have a weak ability to chelate  $\text{Gd}^{3+}$ . Therefore,  $\text{Zn}^{2+}$  is assumed to play an important role in transmetallation with emphasis on linear agents compared with macrocyclic ligands (On-line Figure).<sup>1,2</sup>

Gadolinium enhancement in the CNS occurs as a result of a combination of 2 primary processes: intravascular (vascular) enhancement and interstitial (extravascular) enhancement.<sup>3</sup> CNS-approved  $\text{Gd}^{3+}$  chelates are relatively small and thus have exceedingly high tumbling rates that often exceed the resonant frequencies of water molecules at the clinically used MR imaging field strengths.<sup>4</sup> The degree of enhancement is proportional to both the local concentration of contrast agent and the relaxivity of the water molecules surrounding the contrast agent.<sup>5</sup> Relaxivity reflects the capability to shorten the water proton relaxation rates of T1 and T2/T2\* and is an inherent property of the contrast molecule itself. The relaxivity of the contrast agent is also depen-

dent on the physiologic environment (ie, blood, interstitial fluids, intracellular space) as well as the capacity of the contrast media agent to interact with macromolecules in the blood (protein binding).<sup>6</sup> Recent studies<sup>7</sup> of  $\text{Gd}^{3+}$  relaxivity values in human blood have shown that r1 relaxivity values range between  $3.9$  and  $4.6 \text{ L} \times \text{mmol}^{-1} \times \text{seconds}^{-1}$  at  $1.5\text{T}$  compared with that of gadobenate at  $6.2 \text{ L} \times \text{mmol}^{-1} \times \text{seconds}^{-1}$ . The latter demonstrates a more significant relaxation time difference than the former. On-line Table represents the different types of  $\text{Gd}^{3+}$  and their chemical structure, half-life, excretion rate, and relaxivity ( $1.5\text{T}$ ).

### REFERENCES

1. Kanda T, Oba H, Toyoda K, et al. **Brain gadolinium deposition after administration of gadolinium-based contrast agents.** *Jpn J Radiol* 2016;34:3–9 CrossRef Medline
2. Hao D, Ai T, Goerner F, et al. **MR imaging contrast agents: basic chemistry and safety.** *J Magn Reson Imaging* 2012;36:1060–71 CrossRef Medline
3. Smirniotopoulos JG, Murphy FM, Rushing EJ, et al. **Patterns of contrast enhancement in the brain and meninges.** *Radiographics* 2007;27:525–51 CrossRef Medline
4. Kanal E, Maravilla K, Rowley HA. **Gadolinium contrast agents for CNS imaging: current concepts and clinical evidence.** *AJNR Am J Neuroradiol* 2014;35:2215–26 CrossRef Medline
5. Morana G, Cugini C, Scatto G, et al. **Use of contrast agents in oncological imaging: magnetic resonance imaging.** *Cancer Imaging* 2013;13:350–59 CrossRef Medline
6. Rohrer M, Bauer H, Mintorovitch J, et al. **Comparison of magnetic properties of MRI contrast media solutions at different magnetic field strengths.** *Invest Radiol* 2005;40:715–24 CrossRef Medline
7. Shen Y, Goerner FL, Snyder C et al **T1 relaxivities of gadolinium-based magnetic resonance contrast agents in human whole blood at 1.5, 3, and 7 T.** *Invest Radiol* 2015;50:330–38 CrossRef Medline

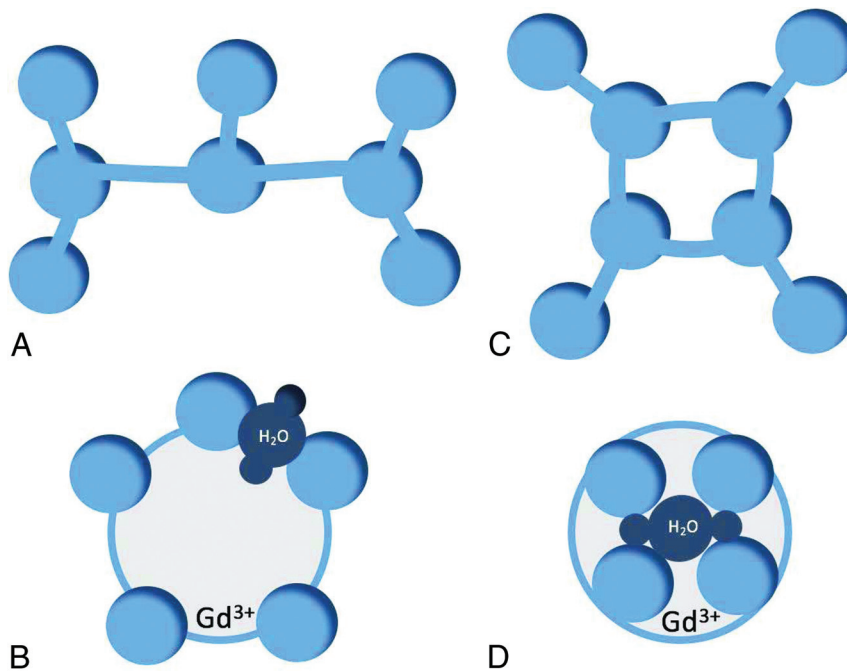

**ON-LINE FIGURE.** Illustrations of the chemical structure of the linear (A and C) and macrocyclic (B and D) ligands and the linear and macrocyclic ligands surrounding  $\text{Gd}^{3+}$  with the attached water molecule ( $\text{H}_2\text{O}$ ). Generally, linear ligands wrap around the  $\text{Gd}^{3+}$  ions (B), forming a more flexible chelate because the cages are not entirely closed, while macrocyclic ligands form a rigid cage with a preorganized cavity to fit the coordination sphere of the  $\text{Gd}^{3+}$  ion (D).

**On-line Table: Types of linear and macrocyclic gadolinium-based contrast agents and their relaxivity, half-life, and clearance rates**

| Chemical Name                         | Solubility | r1 (L/mmol/s) | r2 (L/mmol/s) | Half-Life (Mean) (hr)      | Clearance Rate (Mean) (hr) <sup>a</sup> |
|---------------------------------------|------------|---------------|---------------|----------------------------|-----------------------------------------|
| <b>Linear</b>                         |            |               |               |                            |                                         |
| Gd-DTPA                               | Ionic      | 4.1           | 4.6           | 1.4 ± 0.2 to 2.0 ± 0.7     | 72.9% ± 17.0% to 85.4 ± 9.7% (48)       |
| Gadobenate dimeglumine (Gd-BOPTA)     | Ionic      | 6.3           | 8.7           | 0.2 ± 0.13 to 1.6 ± 0.13   | 91% ± 13% (24)                          |
| Gd-DTPA bis-methylamide (Gd-DTPA-BMA) | Nonionic   | 4.3           | 5.2           | 0.2 ± 2.2 to 1.12 ± 0.16   | 95.4% ± 5.5% (24)                       |
| Gadoversetamide (Gd-DTPA-BMEA)        | Nonionic   | 4.7           | 5.2           | 0.22 ± 0.12 to 1.73 ± 0.33 | 95.5 ± 17.4% (24)                       |
| <b>Macrocyclic</b>                    |            |               |               |                            |                                         |
| Gadoterate meglumine (Gd-DOTA)        | Ionic      | 3.6           | 4.3           | 1.4 ± 0.2 to 2.0 ± 0.7     | 72.9% ± 17.0% to 85.4 ± 9.7% (48)       |
| Gadoteridol (Gd-HP-DO3A)              | Nonionic   | 4.1           | 5.0           | 0.20 ± 0.04 to 1.57 ± 0.08 | 94.4% ± 4.8% (24)                       |
| Gadobutrol (Gd-BT-DO3A)               | Nonionic   | 5.2           | 6.1           | 1.33–2.13                  | 90% (12)                                |

**Note:**—r indicates relaxivity.<sup>a</sup> The number in parentheses represents hours.
